# Supplementary material for: Online Learning and Teaching during the COVID-19 Pandemic in Higher Education in Qatar
Source: MDPI journal article supplement (doi:10.3390/su16062265), 2024-03-08
Supplement: s1 [file s1]

Archive with 1 entries (1 files):
- sustainability-2802849-supplementary.pdf
